# Supplementary material
Source: Springer Nature journal article supplement (https://www.springermedizin.de/resource/supplementary/13058_2010_9541_MOESM6_ESM.pdf/9702208)

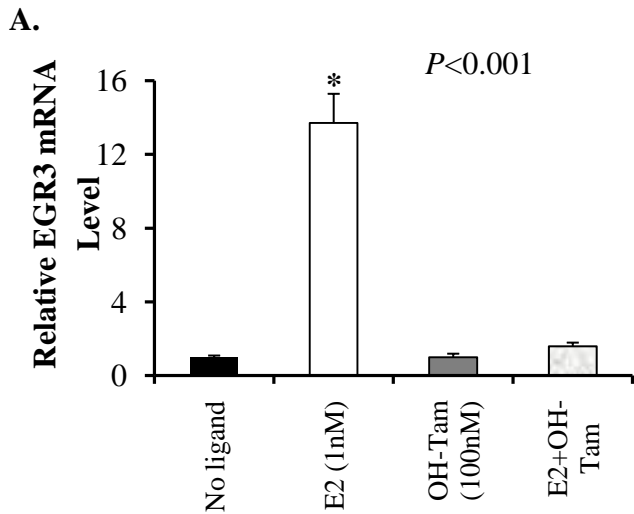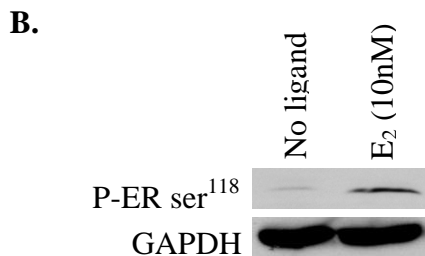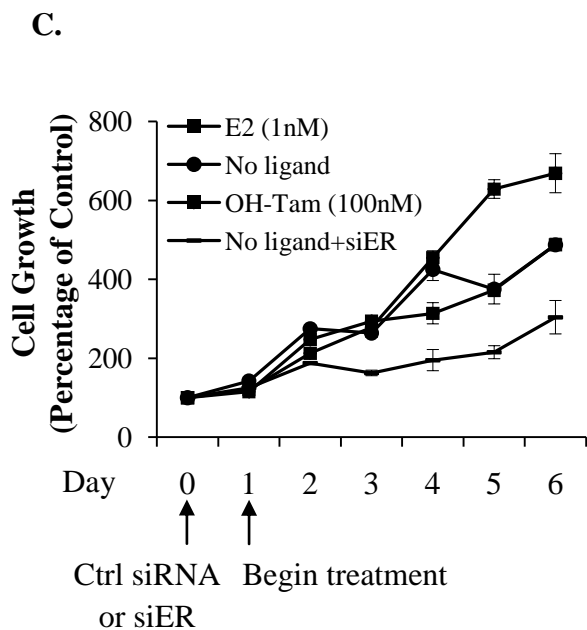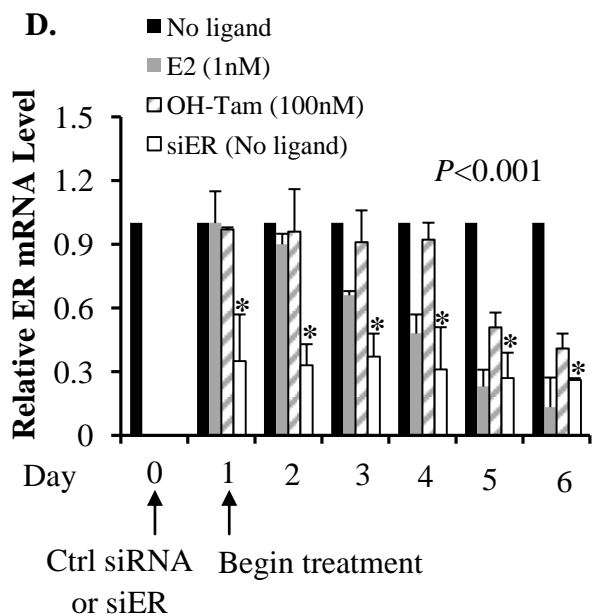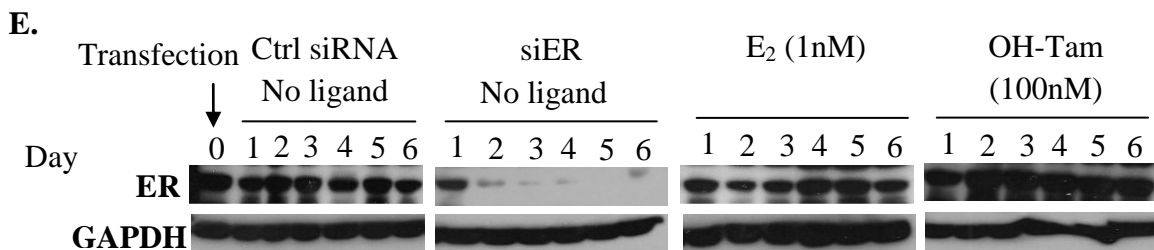

Supplement: MOESM6 [file 9702208]
